# Supplementary material
Source: Research Square preprint supplement (doi:10.21203/rs.3.rs-10122211/v1)
Supplement: Supplementary file 1 [file 40c72510992ea69b0360dcd7.docx]

**Table S1** Chemical composition (% dry matter basis) of five tropical *Urochloa* genotypes evaluated under contrasting light conditions (sun and shade) across three seasons (rainy, *nortes*, and dry) in Yucatán, Mexico.

| **Genotype** | **Light** | **Season** | **DM (%)** | **CP (% DM)** | **NDF (% DM)** |
| --- | --- | --- | --- | --- | --- |
| GP1467 | Sun | Rainy | 92.98 | 8.44 | 64.77 |
| GP1467 | Sun | *Nortes* | 93.08 | 9.05 | 61.45 |
| GP1467 | Sun | Dry | 93.21 | 9.86 | 63.15 |
| GP1467 | Shade | Rainy | 93.04 | 12.36 | 66.24 |
| GP1467 | Shade | *Nortes* | 92.92 | 14.15 | 61.01 |
| GP1467 | Shade | Dry | 92.59 | 14.31 | 60.11 |
| Mulato II | Sun | Rainy | 93.43 | 7.29 | 67.40 |
| Mulato II | Sun | *Nortes* | 93.07 | 8.26 | 61.42 |
| Mulato II | Sun | Dry | 93.04 | 9.26 | 64.57 |
| Mulato II | Shade | Rainy | 93.20 | 14.27 | 64.04 |
| Mulato II | Shade | *Nortes* | 92.26 | 13.66 | 62.03 |
| Mulato II | Shade | Dry | 93.04 | 15.26 | 59.80 |
| GPNF3025-456 | Sun | Rainy | 93.29 | 9.70 | 71.11 |
| GPNF3025-456 | Sun | *Nortes* | 93.26 | 8.62 | 67.39 |
| GPNF3025-456 | Sun | Dry | 93.22 | 8.20 | 69.05 |
| GPNF3025-456 | Shade | Rainy | 93.27 | 10.83 | 71.40 |
| GPNF3025-456 | Shade | *Nortes* | 93.18 | 11.13 | 64.81 |
| GPNF3025-456 | Shade | Dry | 93.59 | 11.59 | 67.90 |
| GP1752 | Sun | Rainy | 93.64 | 7.66 | 68.63 |
| GP1752 | Sun | *Nortes* | 93.64 | 8.60 | 60.14 |
| GP1752 | Sun | Dry | 93.77 | 9.46 | 64.35 |
| GP1752 | Shade | Rainy | 93.62 | 12.34 | 61.63 |
| GP1752 | Shade | *Nortes* | 92.15 | 15.68 | 57.04 |
| GP1752 | Shade | Dry | 93.20 | 13.48 | 63.06 |
| GP0423 | Sun | Rainy | 93.84 | 8.96 | 68.92 |
| GP0423 | Sun | *Nortes* | 93.29 | 9.43 | 62.70 |
| GP0423 | Sun | Dry | 93.72 | 9.56 | 66.80 |
| GP0423 | Shade | Rainy | 93.61 | 11.38 | 70.16 |
| GP0423 | Shade | *Nortes* | 93.58 | 9.80 | 68.78 |
| GP0423 | Shade | Dry | 93.87 | 9.31 | 71.89 |

**Note:** Values were obtained from composite samples pooled from the three field blocks within each genotype × light × season combination. Statistical analyses of crude protein (CP) and neutral detergent fiber (NDF) are reported in the main text.

| **Component** | **DM (%)** | **CP (% DM)** | **NDF (% DM)** |
| --- | --- | --- | --- |
| *Pennisetum purpureum* | 93.3 | 7.41 | 76.61 |
| Concetrate suplement | 91.73 | 29.6 | 8.14 |

**Table S2** Chemical composition of the basal diet offered to rumen-cannulated cattle throughout the *in situ* incubation trial.

**Table S3** Summary of ANOVA results (*P*-values) for the effects of genotype, light environment, season, and their interactions on degradation parameters estimated using the Ørskov and McDonald model in five tropical *Urochloa* genotypes grown under full sun and shade during the rainy, *nortes*, and dry seasons in Yucatán, Mexico.

| **Parameter** | **Genotype** | **Light** | **Season** | **G × L** | **G × S** | **L × S** | **G × L × S** |
| --- | --- | --- | --- | --- | --- | --- | --- |
| a (%) | 0.002 ** | <0.001 *** | <0.001 *** | 0.227 ns | <0.001 *** | 0.341 ns | 0.034 * |
| b (%) | 0.080 ns | 0.045 * | 0.300 ns | 0.521 ns | 0.281 ns | 0.566 ns | 0.097 ns |
| c (h⁻¹) | 0.539 ns | 0.905 ns | 0.026 * | 0.064 ns | 0.434 ns | 0.857 ns | 0.342 ns |
| a + b (%) | 0.114 ns | 0.397 ns | 0.498 ns | 0.456 ns | 0.724 ns | 0.344 ns | 0.329 ns |

**Note:** Values are *P*-values obtained from factorial ANOVA. G = genotype; L = light environment; S = season. ns = not significant; * *P* ≤ 0.05; ** *P* ≤ 0.01; *** *P* ≤ 0.001.
